# Supplementary material for: Oral Squamous Cell Carcinoma in Young Patients Show Higher Rates of EGFR Amplification: Implications for Novel Personalized Therapy
Source: PubMed Central journal article supplement (PMC8666981; doi:10.3389/fonc.2021.750852), 2021-11-29
Supplement: Image_2.pdf [file Image_2.pdf]

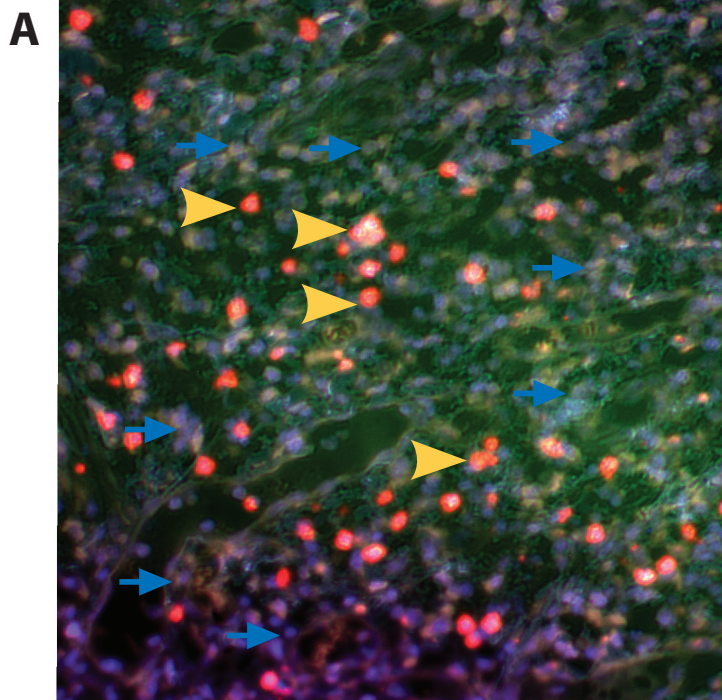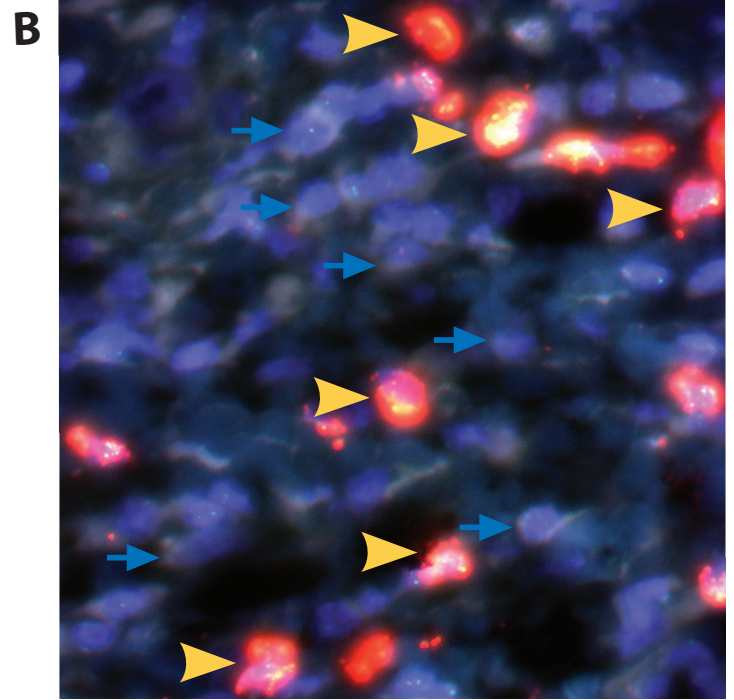

**Supplementary Figure 2.** FISH images demonstrated intratumoral heterogeneity with numerous clusters of OSCC cells with markedly high levels of EGFR-amplification (arrowheads), surrounded by OSCC cells with similar histologic appearance but no amplification (arrows), at 20x (A) and 400x (B) magnification.
