# Supplementary material for: Oral Squamous Cell Carcinoma in Young Patients Show Higher Rates of EGFR Amplification: Implications for Novel Personalized Therapy
Source: PubMed Central journal article supplement (PMC8666981; doi:10.3389/fonc.2021.750852), 2021-11-29

**Patient tumour**

**PDCL**

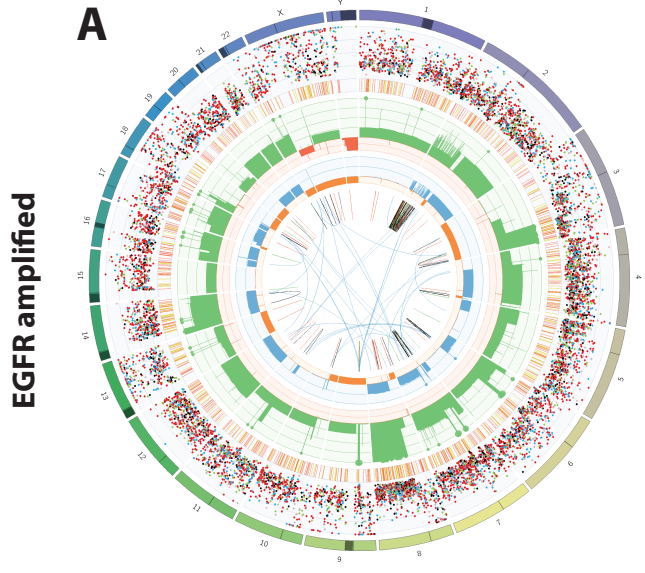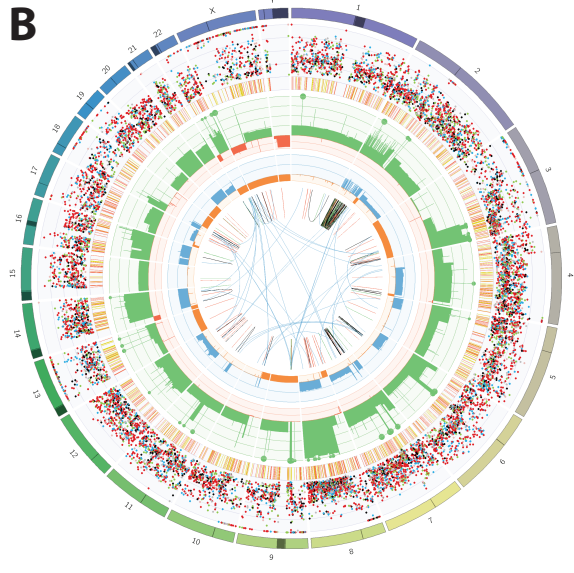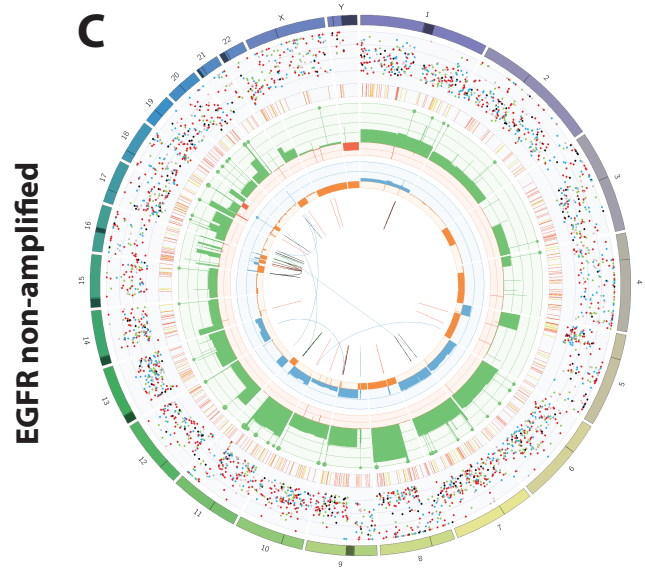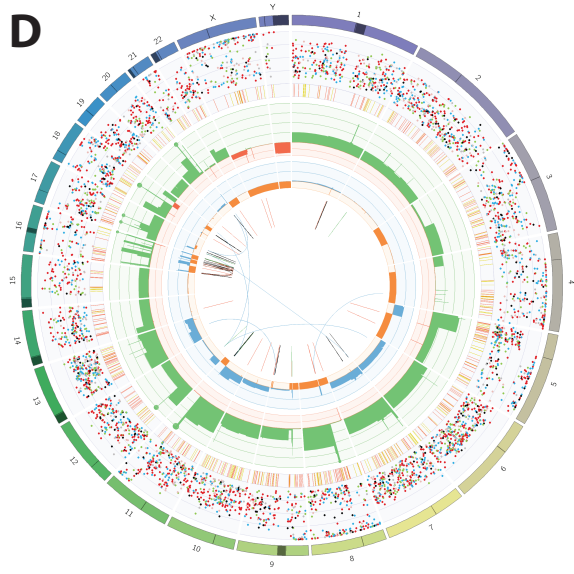

Supplement: Image_4.pdf [file Image_4.pdf]
