# Supplementary material for: Oral Squamous Cell Carcinoma in Young Patients Show Higher Rates of EGFR Amplification: Implications for Novel Personalized Therapy
Source: PubMed Central journal article supplement (PMC8666981; doi:10.3389/fonc.2021.750852), 2021-11-29
Supplement: Image_5.pdf [file Image_5.pdf]

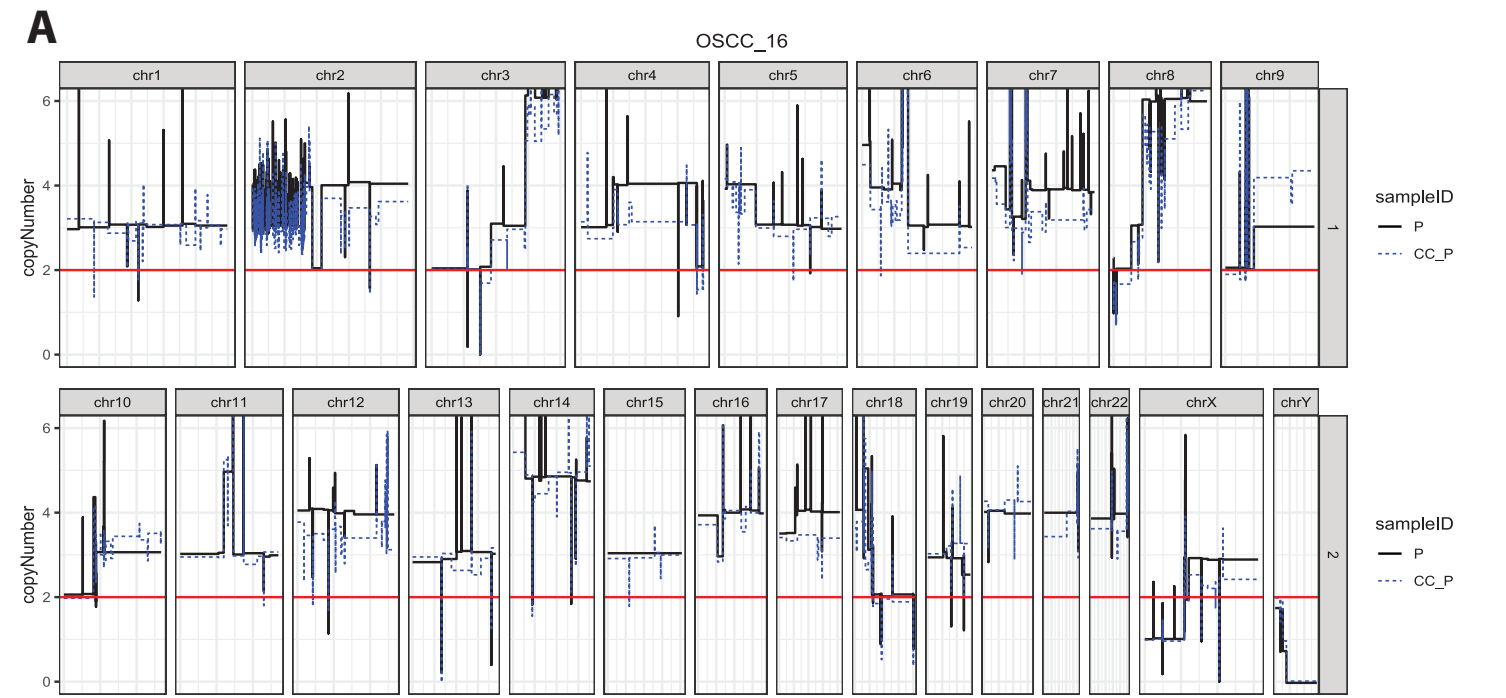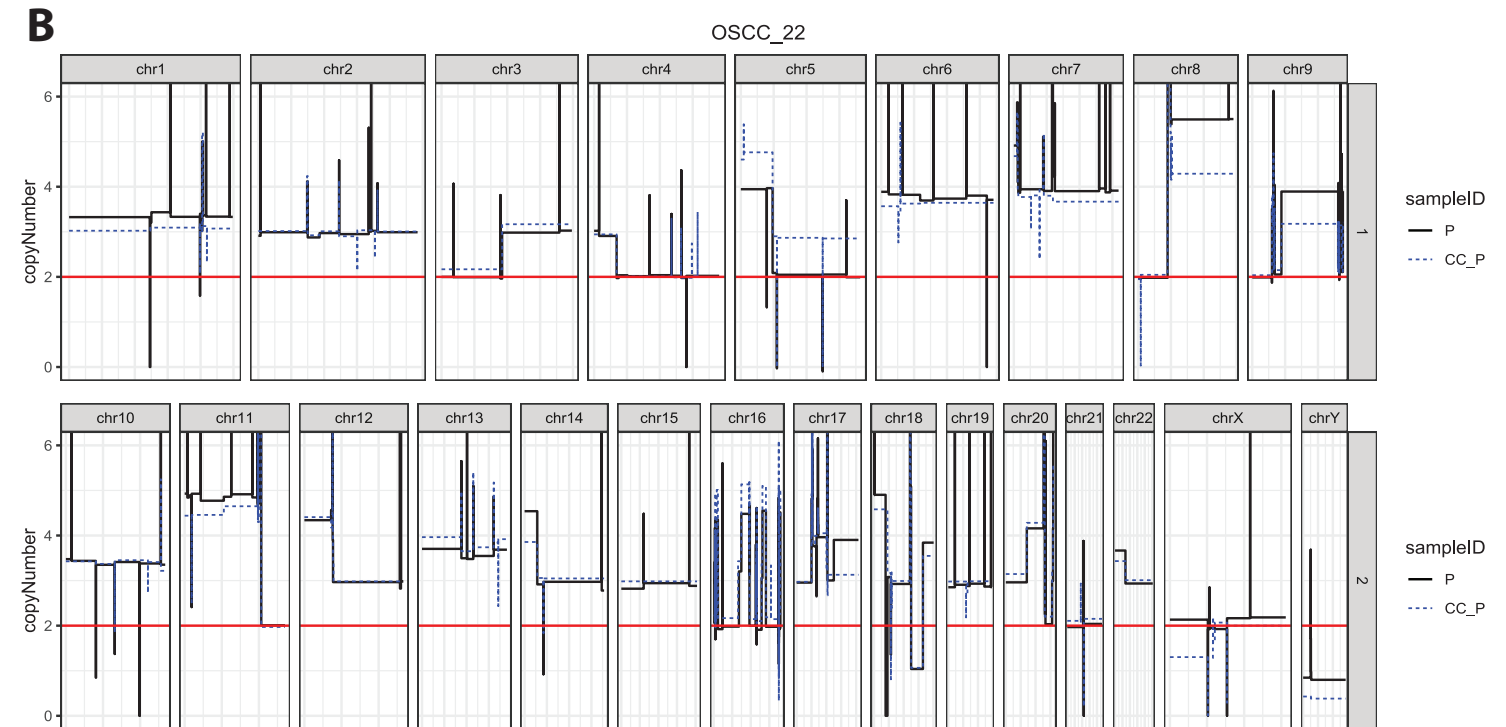

**Supplementary Figure 5.** Linearised copy number plots between matched patient tumour samples and PDCLs (A) with EGFR amplification and (B) without EGFR amplification.
